# Supplementary material for: Natriuretic peptide-guided treatment for heart failure: a systematic review and meta-analysis
Source: PubMed Central journal article supplement — BMJ Evid Based Med. 2019 Jul 20;25(1):33–7. doi: 10.1136/bmjebm-2019-111208 (PMC7029248; doi:10.1136/bmjebm-2019-111208), 2019-07-20
Supplement: bmjebm-2019-111208supp001.pdf [file bmjebm-2019-111208supp001.pdf]

## ONLINE SUPPLEMENTARY APPENDICES

### Appendix 1: Search strategy

| Database | #  | Search                                                                                   |
|----------|----|------------------------------------------------------------------------------------------|
| MEDLINE  | 1  | Heart Failure/                                                                           |
|          | 2  | (heart failure or hf or chf).tw.                                                         |
|          | 3  | 1 or 2                                                                                   |
|          | 4  | Natriuretic Peptide, Brain/                                                              |
|          | 5  | b type natriuretic peptide*.tw.                                                          |
|          | 6  | brain natriuretic peptide*.tw.                                                           |
|          | 7  | brain type natriuretic peptide*.tw.                                                      |
|          | 8  | bnp*.tw.                                                                                 |
|          | 9  | probnp*.tw.                                                                              |
|          | 10 | pro bnp*.tw.                                                                             |
|          | 11 | nt probnp.tw.                                                                            |
|          | 12 | ntprobnp.tw.                                                                             |
|          | 13 | natriuretic peptide type b.tw.                                                           |
|          | 14 | 4 or 5 or 6 or 7 or 8 or 9 or 10 or 11 or 12 or 13                                       |
|          | 15 | Monitoring, Physiologic/                                                                 |
|          | 16 | Prognosis/                                                                               |
|          | 17 | treatment outcome/                                                                       |
|          | 18 | monitor*.tw.                                                                             |
|          | 19 | ((serial or routine or longterm or long term) adj2 (measure* or test* or follow up)).tw. |
|          | 20 | ((guide* or target*) adj2 (therap* or treatment* or pharmacotherap* or strateg*)).tw.    |
|          | 21 | prognos*.tw.                                                                             |
|          | 22 | retest*.tw.                                                                              |
|          | 23 | 15 or 16 or 17 or 18 or 19 or 20 or 21 or 22                                             |
|          | 24 | 3 and 14 and 23                                                                          |
|          | 25 | randomized controlled trial.pt.                                                          |
|          | 26 | controlled clinical trial.pt.                                                            |
|          | 27 | randomized.ab.                                                                           |
|          | 28 | placebo.ab.                                                                              |
|          | 29 | drug therapy.fs.                                                                         |
|          | 30 | randomly.ab.                                                                             |
|          | 31 | trial.ab.                                                                                |
|          | 32 | groups.ab.                                                                               |
|          | 33 | 25 or 26 or 27 or 28 or 29 or 30 or 31 or 32                                             |
|          | 34 | exp animals/ not humans.sh.                                                              |
|          | 35 | 33 not 34                                                                                |
|          | 36 | 24 and 35                                                                                |
|          | 37 | (2016* or 2017* or 2018*).dc,dp.                                                         |
|          | 38 | 36 and 37                                                                                |
| EMBASE   | 1  | Heart Failure/                                                                           |
|          | 2  | Congestive Heart Failure/                                                                |
|          | 3  | (heart failure or hf or chf).tw.                                                         |
|          | 4  | 1 or 2 or 3                                                                              |
|          | 5  | brain natriuretic peptide/                                                               |

|                   |                     |                                                                                          |                                                                           |
|-------------------|---------------------|------------------------------------------------------------------------------------------|---------------------------------------------------------------------------|
| EMBASE<br>(CON'D) | 6                   | b type natriuretic peptide*.tw.                                                          |                                                                           |
|                   | 7                   | brain natriuretic peptide*.tw.                                                           |                                                                           |
|                   | 8                   | brain type natriuretic peptide*.tw.                                                      |                                                                           |
|                   | 9                   | bnp*.tw.                                                                                 |                                                                           |
|                   | 10                  | probnp*.tw.                                                                              |                                                                           |
|                   | 11                  | pro bnp*.tw.                                                                             |                                                                           |
|                   | 12                  | nt probnp.tw.                                                                            |                                                                           |
|                   | 13                  | ntprobnp.tw.                                                                             |                                                                           |
|                   | 14                  | natriuretic peptide type b.tw.                                                           |                                                                           |
|                   | 15                  | 5 or 6 or 7 or 8 or 9 or 10 or 11 or 12 or 13 or 14                                      |                                                                           |
|                   | 16                  | Patient monitoring/                                                                      |                                                                           |
|                   | 17                  | Biologic monitoring/                                                                     |                                                                           |
|                   | 18                  | Prognosis/                                                                               |                                                                           |
|                   | 19                  | treatment outcome/                                                                       |                                                                           |
|                   | 20                  | Follow up/                                                                               |                                                                           |
|                   | 21                  | monitor*.tw.                                                                             |                                                                           |
|                   | 22                  | ((serial or routine or longterm or long term) adj2 (measure* or test* or follow up)).tw. |                                                                           |
|                   | 23                  | ((guide* or target*) adj2 (therap* or treatment* or pharmacotherap* or strateg*)).tw.    |                                                                           |
|                   | 24                  | prognos*.tw.                                                                             |                                                                           |
|                   | 25                  | retest*.tw.                                                                              |                                                                           |
|                   | 26                  | 16 or 17 or 18 or 19 or 20 or 21 or 22 or 23 or 24 or 25                                 |                                                                           |
|                   | 27                  | 4 and 15 and 26                                                                          |                                                                           |
|                   | 28                  | randomized controlled trial/                                                             |                                                                           |
|                   | 29                  | controlled clinical trial/                                                               |                                                                           |
|                   | 30                  | single blind procedure/ or double blind procedure/                                       |                                                                           |
|                   | 31                  | crossover procedure/                                                                     |                                                                           |
|                   | 32                  | random*.tw.                                                                              |                                                                           |
|                   | 33                  | placebo*.tw.                                                                             |                                                                           |
|                   | 34                  | ((singl* or doubl*) adj (blind* or mask*)).tw.                                           |                                                                           |
|                   | 35                  | (crossover or cross over or factorial* or latin square).tw.                              |                                                                           |
|                   | 36                  | (assign* or allocat* or volunteer*).tw.                                                  |                                                                           |
|                   | 37                  | 28 or 29 or 30 or 31 or 32 or 33 or 34 or 35 or 36                                       |                                                                           |
|                   | 38                  | 27 and 37                                                                                |                                                                           |
|                   | 39                  | (exp animal/ or nonhuman/) not human/                                                    |                                                                           |
|                   | 40                  | 38 not 39                                                                                |                                                                           |
|                   | 41                  | (2016* or 2017* or 2018*).dc,dp.                                                         |                                                                           |
|                   | 42                  | 40 and 41                                                                                |                                                                           |
|                   | Cochrane<br>Library | 1                                                                                        | MeSH descriptor: [Heart Failure] this term only                           |
|                   |                     | 2                                                                                        | heart failure or chf or hf:ti,ab,kw (Word variations have been searched)  |
|                   |                     | 3                                                                                        | #1 or #2                                                                  |
|                   |                     | 4                                                                                        | MeSH descriptor: [Natriuretic Peptide, Brain] explode all trees           |
|                   |                     | 5                                                                                        | b type natriuretic peptide*:ti,ab,kw (Word variations have been searched) |
| 6                 |                     | brain natriuretic peptide*:ti,ab,kw (Word variations have been searched)                 |                                                                           |
| 7                 |                     | brain type natriuretic peptide*:ti,ab,kw (Word variations have been searched)            |                                                                           |
| 8                 |                     | pro bnp:ti,ab,kw (Word variations have been searched)                                    |                                                                           |

|                          |                    |                                                                                                                                                                                                                                                                                                                                                                                        |
|--------------------------|--------------------|----------------------------------------------------------------------------------------------------------------------------------------------------------------------------------------------------------------------------------------------------------------------------------------------------------------------------------------------------------------------------------------|
|                          | 9                  | nt probnp:ti,ab,kw (Word variations have been searched)                                                                                                                                                                                                                                                                                                                                |
| Cochrane Library (Con'd) | 10                 | ntpprobnp:ti,ab,kw (Word variations have been searched)                                                                                                                                                                                                                                                                                                                                |
|                          | 11                 | natriuretic peptide type b:ti,ab,kw (Word variations have been searched)                                                                                                                                                                                                                                                                                                               |
|                          | 12                 | #4 or #5 or #6 or #7 or #8 or #9 or #10 or #11                                                                                                                                                                                                                                                                                                                                         |
|                          | 13                 | MeSH descriptor: [Monitoring, Physiologic] this term only                                                                                                                                                                                                                                                                                                                              |
|                          | 14                 | MeSH descriptor: [Prognosis] this term only                                                                                                                                                                                                                                                                                                                                            |
|                          | 15                 | MeSH descriptor: [Treatment Outcome] this term only                                                                                                                                                                                                                                                                                                                                    |
|                          | 16                 | monitor*:ti,ab,kw (Word variations have been searched)                                                                                                                                                                                                                                                                                                                                 |
|                          | 17                 | ((serial or routine or longterm or long term) near/2 (measure* or test* or follow up)):ti,ab,kw (Word variations have been searched)                                                                                                                                                                                                                                                   |
|                          | 18                 | ((guide* or target*) near/2 (therap* or treatment* or pharmacotherap* or strateg*)):ti,ab,kw (Word variations have been searched)                                                                                                                                                                                                                                                      |
|                          | 19                 | prognos*:ti,ab,kw (Word variations have been searched)                                                                                                                                                                                                                                                                                                                                 |
|                          | 20                 | retest*:ti,ab,kw (Word variations have been searched)                                                                                                                                                                                                                                                                                                                                  |
|                          | 21                 | #13 or #14 or #15 or #16 or #17 or #18 or #19 or #20                                                                                                                                                                                                                                                                                                                                   |
| 22                       | #3 and #12 and #21 |                                                                                                                                                                                                                                                                                                                                                                                        |
| Web of Science           | 1                  | TS=("b-type natriuretic peptide*") OR TS=(btype natriuretic peptide*) OR TS=("b type natriuretic peptide*") OR TS=("type-b natriuretic peptide*") OR TS=("natriuretic peptide* type-b") OR TS=("brain natriuretic peptide*") OR TS=("brain type natriuretic peptide*") OR TS=(bnp*) OR TS=(probnp* or "pro bnp*") OR TS=("nt probnp" or ntprobnp) OR TS=("natriuretic peptide type b") |
|                          | 2                  | TS=(monitor*) OR TS=((serial OR routine OR longterm OR long term) SAME (measure* or test* or follow up))) OR TS=((serial OR routine OR longterm OR long term) SAME (measure* or test* or follow up))) OR TS=(prognos*) OR TS=(retest*)                                                                                                                                                 |
|                          | 3                  | 2 AND 1                                                                                                                                                                                                                                                                                                                                                                                |
|                          | 4                  | TS((((random* or blind* or allocat* or assign* or trial* or placebo* or crossover* or cross-over*)))                                                                                                                                                                                                                                                                                   |
|                          | 5                  | 4 AND 3                                                                                                                                                                                                                                                                                                                                                                                |
|                          | 6                  | 4 AND 3 Timespan=2016-2017                                                                                                                                                                                                                                                                                                                                                             |
| ClinicalTrials.gov       | 1                  | Title=natriuretic peptide OR bnp OR pro bnp OR probnp OR ntprobnp OR pro-bnp OR nt-probnp                                                                                                                                                                                                                                                                                              |
|                          | 2                  | Intervention=natriuretic peptide OR bnp OR pro bnp OR probnp OR ntprobnp OR pro-bnp OR nt-probnp                                                                                                                                                                                                                                                                                       |
| WHO ICTRP                | 1                  | Title=natriuretic peptide OR bnp OR pro bnp OR probnp OR ntprobnp OR pro-bnp OR nt-probnp                                                                                                                                                                                                                                                                                              |
|                          | 2                  | Intervention=natriuretic peptide OR bnp OR pro bnp OR probnp OR ntprobnp OR pro-bnp OR nt-probnp                                                                                                                                                                                                                                                                                       |

## Appendix 2: Study characteristics

| Study (study name)              | Country | Setting                | Follow-up schedule                                                      | NP target             | Clinical target                                                         | Primary endpoint                 | Outcome data reported relevant to systematic review | Treatment algorithm (NP group)                                                                                                                                                                                                                                                                                                     | Target duration of follow-up | Actual duration of follow-up (mean (SD), months, unless stated otherwise) |               |
|---------------------------------|---------|------------------------|-------------------------------------------------------------------------|-----------------------|-------------------------------------------------------------------------|----------------------------------|-----------------------------------------------------|------------------------------------------------------------------------------------------------------------------------------------------------------------------------------------------------------------------------------------------------------------------------------------------------------------------------------------|------------------------------|---------------------------------------------------------------------------|---------------|
|                                 |         |                        |                                                                         |                       |                                                                         |                                  |                                                     |                                                                                                                                                                                                                                                                                                                                    |                              | NP group                                                                  | Control group |
| Anguita 2010 <sup>1</sup>       | Spain   | Hospital               | Minimum 4 visits in 1st quarter, 6 visits in 1st year, 7 visits overall | BNP 100 pg/ml         | Framingham score (> or < 2)                                             | Composite: ACM, CV admission     | ACM, HFA                                            | 1. Increased dose of loop diuretic. 2. Doubling the dose of ACEi. 3. Addition of spironolactone. 4. Double dose of beta blocker. 5. Addition of an ARB. 6. Addition of chlorthalidone. 7. Addition of digoxin. 8. Add other drugs                                                                                                  | 18 months                    | 16 (4)                                                                    | 16 (5)        |
| Beck-da-Silva 2005 <sup>2</sup> | Canada  | Hospital (out-patient) | Minimum 4 visits in 1st quarter, 4 visits overall                       | No target set/stated  | Clinical assessment                                                     | Beta blocker titration           | ACM, ACA, QoL                                       | 1. Clinically better, BNP decreasing: $\beta$ blocker increased one step. 2. Clinically same or mildly worse, BNP decreasing: $\beta$ blocker increased one step. 3. Clinically same or better, BNP increasing: $\beta$ blocker unchanged. 4. Clinically worse, BNP increasing: $\beta$ blocker decreased one step or discontinued | 3 months                     | 3 absolute                                                                |               |
| Berger 2010 <sup>3</sup>        | Austria | Hospital & community   | Minimum 6 visits in 1st quarter, 8 in 1st year, 8 to 26 visits overall  | NT-proBNP <2200 pg/mL | Structured clinical assessment (multi-disciplinary care) and usual care | Survival without hospitalisation | ACM, HFM, HFA, ACA, QoL                             | Increase in treatment of HF medication                                                                                                                                                                                                                                                                                             | 18 months                    | 15 (13 - 16) median (IQR)                                                 |               |

|                                        |               |                        |                                                                                |                                                   |                     |                                                                    |                                |                                                                                                      |                  |                                   |
|----------------------------------------|---------------|------------------------|--------------------------------------------------------------------------------|---------------------------------------------------|---------------------|--------------------------------------------------------------------|--------------------------------|------------------------------------------------------------------------------------------------------|------------------|-----------------------------------|
| Eurlings 2010 (PRIMA) <sup>4</sup>     | Netherlands   | Hospital               | Minimum 3 visits in 1st quarter, 6 in 1st year, estimated 10 visits overall    | Lowest level at discharge or at 2 weeks follow-up | Clinical assessment | Days alive outside the hospital                                    | ACM, QoL                       | Treatment was intensified according to the ESC HF treatment guidelines                               | 2 years          | 702 days (488 - 730) median (IQR) |
| Felker 2017 (GUIDE-IT) <sup>5</sup>    | US and Canada | Hospital & Community   | Minimum 2 visits in 1st quarter, 5 in 1st year, 12 visits overall              | NT-proBNP 1000 pg/ml                              | Clinical assessment | Composite: time to 1st hospitalisation or cardiovascular mortality | ACM, HFA                       | Not prescriptive but encouraged to prioritise titration of neuro-hormonal antagonists over diuretics | 1 - 4 years      | 15 months (median)                |
| Januzzi 2012 (PRO-TECT) <sup>6</sup>   | USA           | Hospital               | Minimum 2 visits in 1st quarter, quarterly visits up to a maximum of 12 months | NT-proBNP ≤1000 pg/ml                             | Clinical assessment | Total cardiovascular events                                        | HFA, Adverse events, Cost, QoL | Treatment according to ACF/AAT guidelines                                                            | 6 - 12 months    | 10 (3)                            |
| Jourdain 2007 (STARS-BNP) <sup>7</sup> | France        | Hospital (out-patient) | Minimum 4 visits in 1st quarter, 6 in 1st year and overall                     | BNP <100pg/ml                                     | Clinical assessment | Composite: CHF-related death or CHF hospital stay                  | ACM, HFM, HFA, ACA             | Treatment was intensified according to the ESC HF treatment guidelines                               | Minimum 6 months | 15 median                         |

|                                                 |                 |                                              |                                                                |                                                                      |                                  |                                                                                                         |                               |                                                                                                                                                                                                                                                                                                                                                      |                   |              |
|-------------------------------------------------|-----------------|----------------------------------------------|----------------------------------------------------------------|----------------------------------------------------------------------|----------------------------------|---------------------------------------------------------------------------------------------------------|-------------------------------|------------------------------------------------------------------------------------------------------------------------------------------------------------------------------------------------------------------------------------------------------------------------------------------------------------------------------------------------------|-------------------|--------------|
| Karlstrom 2011 (UPSTEP) <sup>8</sup>            | Sweden & Norway | Hospital                                     | Minimum 3 visits in 1 quarter, seven in first year and overall | BNP <150 ng/L in patients <75 years, <300 ng/L in patients >75 years | Clinical assessment              | Composite: ACM, hospitalisation, worsening HF                                                           | ACM, HFM, HFA, ACA, QoL       | Treatment was intensified in stepwise manner whilst following guideline doses                                                                                                                                                                                                                                                                        | Minimum 12 months | 12           |
| Krupicka 2010 (OPTIMA) <sup>9</sup>             | Czech republic  | Hospital (specialist HF clinic out-patients) | Minimum 2 visits in 1st quarter, 5 in 1st year, 9 overall      | BNP <100 pg/ml                                                       | Clinical assessment              | Composite: cardiovascular death, hospitalisation for worsening HF, outpatients episodes of worsening HF | ACM, HFM, HFA, adverse events | 1. In case of either daily loop diuretic dose was increased or second diuretic was added. In patients without congestion ACEi or ARB dose was increased. 2. Increase of betablocker dose. 3. Increase of MRA daily dose                                                                                                                              | Minimum 12 months | 18 average   |
| Lainchbury 2010 (BATTLE-SCAR-RED) <sup>10</sup> | New Zealand     | Hospital and Community                       | Minimum 2 visits in 1st quarter, 5 in 1st year, 9 overall      | NT-proBNP <150 pmol/l (approx. 1300 pg/ml)                           | Clinically guided and usual care | ACM, composite: ACM and HF hospitalisation                                                              | ACM, HFA, QoL                 | 1. Algorithm for heart score >2: i) increase frusemide; ii) addition of digoxin iii) add spironolactone iv) increase frusemide v) addition of bendrofluaizide or metolazone. 2. Algortihm for NT-proBNP >150 p/mol, heart score stable: i) optimisation of ACE inhibitor ii) addition or titration of beta blockade iii) addition of further therapy | 2-3 years         | Not reported |
| Li 2015 <sup>11</sup>                           | China           | Hospital                                     | Minimum 5 visits in 1st month and overall                      | BNP 50% of the basal level or less than 300 pg/ml                    | Clinical assessment              | No primary endpoint reported                                                                            | HFM                           | Metoprolol succinate doubled every visit. If the BNP level did not decrease, but was elevated more than 10% then the metoprolol succinate was stopped or decrease whilst application of intravenous                                                                                                                                                  | 1 month           | 1 absolute   |

|                                         |                         |                        |                                                               |                                                                                |                     |                                                                          |                                            |                                                                                                                                        |           |           |
|-----------------------------------------|-------------------------|------------------------|---------------------------------------------------------------|--------------------------------------------------------------------------------|---------------------|--------------------------------------------------------------------------|--------------------------------------------|----------------------------------------------------------------------------------------------------------------------------------------|-----------|-----------|
|                                         |                         |                        |                                                               |                                                                                |                     |                                                                          |                                            | cardiotonic, vasodilator or diuretic drugs took place until start up BNP level achieved then the metoprolol succinate was recommenced. |           |           |
| Maeder 2013 <sup>12</sup>               | Switzerland and Germany | Hospital (out-patient) | Minimum 3 visits in 1st quarter, 5 in 1st year and 6+ overall | NT-proBNP < 400 pg/mL in patients <75 years; < 800 pg/mL in patients >75 years | Clinical assessment | 18 month survival free of any hospitalisation                            | ACM, adverse events, cost, QoL             | Treatment based on ESC, ACF/AHA guidelines with predefined escalation rules                                                            | 18 months | 18 months |
| Persson 2010 (SIGNAL-HF) <sup>13</sup>  | Sweden                  | community              | Minimum 4 visits in 1st quarter, 6 in 1st year, 6 overall     | NT-proBNP At least a 50% reduction from baseline                               | Clinical assessment | Composite: days alive, days out of hospital, symptom score from the KCCQ | ACM, adverse events, QoL                   | Stepwise treatment schedule adhering to ESC guidelines for target doses.                                                               | 9 months  | 9 months  |
| Pfisterer 2009 (TIME-CHF) <sup>14</sup> | Switzerland & Germany   | Hospital (out-patient) | Minimum 3 visits in 1st quarter, 5 in 1st year, 6 overall     | NT-proBNP <400 pg/mL in patients <75 years, <800 pg/mL in patients ≥75 years   | Clinical assessment | 18 month survival free of any hospitalisation and QoL                    | ACM, adverse events, cost, quality of life | Treatment based on ESC, ACF/AHA guidelines with predefined escalation rules                                                            | 18 months | 18 months |

|                                       |         |                                  |                                                              |                                                           |                                           |                                                              |                                                           |                                                                                                                                                                                                                                                                                                                                                                                                      |                       |              |
|---------------------------------------|---------|----------------------------------|--------------------------------------------------------------|-----------------------------------------------------------|-------------------------------------------|--------------------------------------------------------------|-----------------------------------------------------------|------------------------------------------------------------------------------------------------------------------------------------------------------------------------------------------------------------------------------------------------------------------------------------------------------------------------------------------------------------------------------------------------------|-----------------------|--------------|
| Schou 2013 (North-Star) <sup>15</sup> | Denmark | Hospital (heart failure clinics) | Minimum 2 visits in 1st quarter, 5 in 1st year, 17 overall   | No target                                                 | Clinical assessment                       | Composite: ACM, admission for a protocol-specified CV cause  | ACM, HFA, ACA, QoL                                        | Treatment using clinical checklist. Treatment included intensification of drugs and education                                                                                                                                                                                                                                                                                                        | 6 months to 4.5 years | 2.5 years    |
| Shah 2011 (STAR-BRITE) <sup>16</sup>  | USA     | Hospital                         | Minimum 5 visits in 1st quarter, 6 in 1st year and overall   | Discharge BNP                                             | Congestion score (key clinical variables) | Number of days alive and not hospitalised during the 90 days | ACM, ACA                                                  | Investigators optimized ACE inhibitors, ARBs, beta-blockers, aldosterone antagonists, and other evidence-based HF medications according to their clinical judgment.                                                                                                                                                                                                                                  | 90 4 months           | Not reported |
| Shochat 2012 <sup>17</sup>            | Israel  | Hospital (out-patient)           | Minimum 2 visits in 1st quarter, remainder unclear           | No target                                                 | Clinical assessment                       | NS                                                           | ACM, (data available but not confirmed for HFM, HFA, ACA) | 1. Amount of diuretics was increased. 2. ACEi, AT1 blocker and/or b-Blocker increased. Doses were determined by treating physicians                                                                                                                                                                                                                                                                  | NS                    | 16 (11)      |
| Skvortsov 2015 <sup>18</sup>          | Russia  | Hospital (out-patient)           | Minimum 4 visits in 1st quarter, 8 in first year and overall | NT-proBNP <1000 pg/mL or at least 50% reduction discharge | Clinical assessment                       | CV events                                                    | ACM, HFM, HFA, QoL                                        | 1. Increased NT-proBNP continued without deterioration of clinical symptoms then diuretics were recommended 2. Increase in NT-proBNP with increase in clinical HF symptoms then patients immediately received diuretics. 3. Decrease in NT-proBNP plus increase in clinical symptoms then patients immediately received correction of diuretic therapy (this did effect did not happen in the study) | 1 year                | 10.5 (2.1)   |



|                                  |                |          |                                                                                                                               |                                                            |                        |           |                                                  |                                   |           |            |
|----------------------------------|----------------|----------|-------------------------------------------------------------------------------------------------------------------------------|------------------------------------------------------------|------------------------|-----------|--------------------------------------------------|-----------------------------------|-----------|------------|
| Trough-ton<br>2000 <sup>19</sup> | New<br>Zealand | Hospital | Minimum 1<br>visits in 1st<br>quarter, 4 in<br>first year,<br>visits 2<br>weekly until<br>target met<br>and then 3<br>monthly | NT-<br>proBNP<br>200<br>pmol/L<br>(IPD:<br><1700<br>pg/ml) | Clinical<br>assessment | CV events | ACM, HFM,<br>HFA, ACA,<br>adverse<br>events, QoL | Stepwise increase in<br>treatment | 17 months | 9.5 median |
|----------------------------------|----------------|----------|-------------------------------------------------------------------------------------------------------------------------------|------------------------------------------------------------|------------------------|-----------|--------------------------------------------------|-----------------------------------|-----------|------------|

Where NP: natriuretic peptide, BNP: B-type natriuretic peptide, NT-proBNP: N-terminal pro B-type natriuretic peptide, ACM: all-cause mortality, HF: heart failure, CHF: chronic heart failure, HFM: heart failure mortality, HFA: heart failure admission, ACA: all-cause admission, QoL: quality of life, ESC: European Society of Cardiology, CV: cardiovascular, ACF: American College of Cardiology Foundation, AAT: American Association Task Force, AHA: American Heart Association, KCCQ: Kansas City Cardiomyopathy Questionnaire

**Appendix 3: Participant characteristics at baseline**

| Study (study name)                     | NP group (N) | Control group (N)            | Age (mean (SD), unless stated) |                         | Male (%) |               | LVEF (mean %, (SD), unless stated) |                         | NYHA stage                         |                                    | Baseline NP biomarker (pg/ml mean (SD), unless stated) |                                 |                                 |
|----------------------------------------|--------------|------------------------------|--------------------------------|-------------------------|----------|---------------|------------------------------------|-------------------------|------------------------------------|------------------------------------|--------------------------------------------------------|---------------------------------|---------------------------------|
|                                        |              |                              | NP group                       | Control group           | NP group | Control group | NP group                           | Control group           | NP group                           | Control group                      | Biomarker                                              | NP group                        | Control group                   |
| Anguita 2010 <sup>1</sup>              | 30           | 30                           | 70 (8)                         | 69 (12)                 | 67       | 70            | 44 (18)                            | 46 (18)                 | Stage III 73%, IV 27%              | Stage III 63%, IV 37%              | BNP                                                    | 57 (77)                         | 65 (97)                         |
| Beck-da-Silva 2005 <sup>2</sup>        | 21           | 20                           | 64.5 (15.2)                    | 65.6 (13.5)             | 33.3     | 35            | 23.8 (8.8)                         | 20.9 (9.2)              | 2.6 ± 0.7 (mean, SD)               | 2.4 ± 0.6 (mean, SD)               | BNP                                                    | 502.3 (411.3)                   | 701.6 (409.9)                   |
| Berger 2010 <sup>3</sup>               | 92           | 96 (multi-disciplinary care) | 70 (12)                        | 73 (11)                 | 63       | 70            | NS*                                | NS*                     | NS                                 | NS                                 | NT-proBNP                                              | 2216 (355-9649) mean (CI)       | 2469 (355-18487) mean (CI)      |
|                                        |              | 90 (usual care)              |                                | 71 (13)                 |          | 69            |                                    | NS*                     |                                    |                                    |                                                        |                                 | NS                              |
| Eurlings 2010 (PRIMA) <sup>4</sup>     | 174          | 171                          | 71.6 (12)                      | 72.8 (11.7)             | 55       | 60            | 34.9 (13.7)                        | 36.7 (14.8)             | Stage I 11.5%, II 64.9%, III 23.6% | Stage I 9.9%, II 70.8%, III 19.3%  | NT-proBNP                                              | 2961 (1383-5144) median (IQR)   | 2936 (1291-5525) median (IQR)   |
| Felker 2017 (GUIDE-IT) <sup>5</sup>    | 446          | 448                          | 62 (51-70) median (IQR)        | 64 (54-72) median (IQR) | 69       | 67            | 24 (19-30) median (IQR)            | 25 (20-30) median (IQR) | Stage I 8%, II 50%, II 40%, IV 2%  | Stage I 5%, II 52%, III 41%, IV 2% | NT-proBNP                                              | 2632 (1462 - 5235) median (IQR) | 2668 (1481 - 5604) median (IQR) |
| Januzzi 2012 (PROTECT) <sup>6</sup>    | 75           | 76                           | 63 (14.5)                      | 63.5 (13.5)             | 88.2     | 81.3          | 28 (8.7)                           | 25.9 (8.3)              | Stage II or III 85.5%              | stage II or III 84.2%              | NT-proBNP                                              | 2344 median                     | 1946 median                     |
| Jourdain 2007 (STARS-BNP) <sup>7</sup> | 110          | 110                          | 65 (5)                         | 66 (6)                  | 59       | 56            | 29.9 (7.7)                         | 31.8 (8.4)              | 2.29 (0.6) mean (SD)               | 2.21 (0.62) mean (SD)              | BNP                                                    | 352 (260)                       | Not measured                    |
| Karlstrom 2011 (UP-STEP) <sup>8</sup>  | 147          | 132                          | 71.6 (9.7)                     | 70.1 (10)               | 73       | 73            | <30: 57%                           | <30: 58%                | Stage II 32%, III 52%, IV 15%      | stage II 27%, III 59%, IV 14%      | BNP                                                    | 808.2 (676.1) ng/l              | 898.9 (915.3) ng/l              |

|                                                |     |                         |                            |                            |      |         |                          |                                    |                                     |                                    |           |                                                                     |                                                                       |
|------------------------------------------------|-----|-------------------------|----------------------------|----------------------------|------|---------|--------------------------|------------------------------------|-------------------------------------|------------------------------------|-----------|---------------------------------------------------------------------|-----------------------------------------------------------------------|
| Krupicka 2010 (OPTIMA) <sup>9</sup>            | 26  | 26                      | 71 (36-89) mean (range)    | 70 (45-84) mean (range)    | 69   | 65      | 23 (6)                   | 23 (7)                             | 2.53 mean                           | 2.34 mean                          | BNP       | 704 (228-2852) median (range)                                       | 633 (276-3756) median (range)                                         |
| Lainchbury 2010 (BATTLESCAR-RED) <sup>10</sup> | 121 | 121 (clinically guided) | 76 (44-89) median (range)  | 76 (34-89) Median (range)  | 63   | 67      | 40 (15)                  | 39 (15)                            | Stage I 12%, II 68%, III 18%, IV 2% | Stage I 7%, II 66%, III 25%, IV 2% | NT-proBNP | 2012 (516-10233) median (IQR)                                       | 1996 (425-6588) median (IQR)                                          |
|                                                |     | 122 (usual care)        | 75 (31-89) Median (range)  | 62                         |      | 37 (15) |                          | stage 1 7%, II 67%, III 25%, IV 1% |                                     | 2012 (425-10571) median (IQR)      |           |                                                                     |                                                                       |
| Li 2015 <sup>11</sup>                          | 96  | 99                      | 57 (40-78) average (range) | 58 (38-81) average (range) | 56.3 | 55.4    | 30 (8.1)                 | 28 (7.9)                           | NS                                  | NS                                 | BNP       | 1167.8 (219.9)                                                      | 1145.8 (224.9)                                                        |
| Maeder 2013 <sup>12</sup>                      | 59  | 64                      | 80.3 (6.8)                 | 79.9 (7.2)                 | 36   | 33      | 56 (6)                   | 56 (7)                             | 49 (83) ≥ stage III (number, %)     | 53 (83) ≥ III (number, %)          | NT-proBNP | 2210 (1514-4081) ng/L, median (IQR)                                 | 2191 (1478-4890) ng/L, median (IQR)                                   |
| Persson 2010 (SIGNAL-HF) <sup>13</sup>         | 126 | 124                     | 78                         | 77                         | 76   | 66      | 31 (9)                   | 33 (7)                             | stage II 62%, III 38%               | Stage II 61%, III 39%              | NT-proBNP | 2661 (2.1) ng/L geometric mean (coefficient of variation)           | 2429 (2.1) ng/L geometric mean (coefficient of variation)             |
| Pfisterer 2009 (TIME-CHF) <sup>14</sup>        | 251 | 248                     | 76                         | 77                         | 68.1 | 62.9    | 29.8 (7.7)               | 29.7(7.9)                          | 186 ≥ stage III (number)            | 185 ≥ stage III (number)           | NT-proBNP | 3998 (2075-7220) median (IQR)                                       | 4657 (2455-7520) median (IQR)                                         |
| Shah 2011 (STARBRITE) <sup>16</sup>            | 68  | 69                      | 59 (50-70) median (IQR)    | 63 (52-74) median (IQR)    | 67.7 | 72.3    | 20% (15-25) median (IQR) | 20% (15-25) median (IQR)           | NS                                  | NS                                 | BNP       | 663(271-1560) at admission, 453 (221-1135) at discharge median(IQR) | 621 (216-1175) at admission, 440 (189 - 981) at discharge median(IQR) |

|                                      |     |     |                         |                         |      |    |                         |                         |                        |                        |           |                                       |                                      |
|--------------------------------------|-----|-----|-------------------------|-------------------------|------|----|-------------------------|-------------------------|------------------------|------------------------|-----------|---------------------------------------|--------------------------------------|
| Schou 2013 (NorthStar) <sup>15</sup> | 199 | 208 | 72 (56-85) mean (range) | 74 (51-89) mean (range) | 76   | 76 | 30 (14-45) mean (range) | 30 (15-45) mean (range) | Stage I-II 86 %        | Stage I-II 85 %        | NT-proBNP | 1884 (1033-10435) statistic not given | 2042 (1023-9668) statistic not given |
| Shochat 2012 <sup>17</sup>           | 60  | 60  | 70.2 (11)               | 69.4 (10.5)             | 88.3 | 83 | 23 (6)                  | 23 (7)                  | 2.53 mean              | 2.34 mean              | NT-proBNP | 5868 (2532)                           | 5820(2434)                           |
| Skvortsov 2015 <sup>18</sup>         | 35  | 35  | 63.7 (8.6)              | 62.5 (13.3)             | 61   | 89 | 29.2 (6.1)              | 29.4 (6.1)              | Stage III 23%, IV 76%  | Stage III 26%, IV 74%  | NT-proBNP | 3750 (2224-6613) median (IQR)         | 2783.0 (2021.5-4827.5) median (IQR)  |
| Troughton 2000 <sup>19</sup>         | 33  | 36  | 68                      | 72                      | 78   | 75 | 28                      | 26                      | 2.3 mean, stage II 72% | 2.3 mean, stage II 67% | NT-proBNP | 217 pmol/L mean                       | 251 pmol/L mean                      |

Where NP: natriuretic peptide, BNP: B-type natriuretic peptide, NT-proBNP: N-terminal pro B-type natriuretic peptide, SD: standard deviation, IQR: interquartile range, LVEF: left ventricular ejection fraction, NYHA: New York Heart Association, NS: Not stated, \*: Baseline LVEF not stated, however, study inclusion criteria states 'Cardiothoracic ratio >0.5 or LVEF <40%'

#### Appendix 4: Adverse events where reported

| Study        | Adverse events   |               |       |                          |               |       |                                                                                                                                      |               |       |                                                                                                                                                                                                                                                                                                                                                                                                                                                                                                                                                                                                                                                                                       |
|--------------|------------------|---------------|-------|--------------------------|---------------|-------|--------------------------------------------------------------------------------------------------------------------------------------|---------------|-------|---------------------------------------------------------------------------------------------------------------------------------------------------------------------------------------------------------------------------------------------------------------------------------------------------------------------------------------------------------------------------------------------------------------------------------------------------------------------------------------------------------------------------------------------------------------------------------------------------------------------------------------------------------------------------------------|
|              | Participants (N) |               |       | Missing participants (N) |               |       | Number of adverse events<br>(definitions not consistent or not stated; not clear whether first event per participant or every event) |               |       | Additional data either from published articles or supplied by author                                                                                                                                                                                                                                                                                                                                                                                                                                                                                                                                                                                                                  |
|              | NP-guided group  | Control group | Total | NP-guided group          | Control group | Total | NP-guided group                                                                                                                      | Control group | Total |                                                                                                                                                                                                                                                                                                                                                                                                                                                                                                                                                                                                                                                                                       |
| Felker 2017  | 446              | 448           | 894   | 49                       | 44            | 93    | 51                                                                                                                                   | 36            | 87    |                                                                                                                                                                                                                                                                                                                                                                                                                                                                                                                                                                                                                                                                                       |
| Januzzi 2012 | 75               | 76            | 151   | 6                        | 6             | 12    | 30                                                                                                                                   | 23            | 53    | No significant differences between groups.<br>No specific event showed a significant difference between groups<br>Events in intervention group: Abdominal pain (1); acute renal failure (4); anaemia (1); atrial fibrillation (2); cough (2); diarrhoea (2); dizziness (5); fever (1); gastrointestinal bleeding (1); hyper/hypokalaemia (3); hypotension (4); respiratory infection (2); syncope(2)<br>Events in control group: Abdominal pain (1); acute renal failure (3); anaemia (0); atrial fibrillation (5); cough (1); diarrhoea (1); dizziness (4); fever (1); gastrointestinal bleeding (1); hyper/hypokalaemia (1); hypotension (0); respiratory infection (4); syncope(1) |
| Krupicka     | 26               | 26            | 52    | 0                        | 0             | 0     | 7                                                                                                                                    | 0             | 7     | Email from author 17.10.14 confirmed: Hyperkalaemia (n = 2); orthostatic hypotension (n = 2); bradycardia (n = 3)                                                                                                                                                                                                                                                                                                                                                                                                                                                                                                                                                                     |

|                   |     |     |     |    |    |    |                 |                 |     |                                                                                                                                                                                                                                                                                                                                                                                                                                   |
|-------------------|-----|-----|-----|----|----|----|-----------------|-----------------|-----|-----------------------------------------------------------------------------------------------------------------------------------------------------------------------------------------------------------------------------------------------------------------------------------------------------------------------------------------------------------------------------------------------------------------------------------|
| Maeder<br>2013    | 59  | 64  | 123 | 12 | 12 | 24 | Not<br>reported | Not<br>reported | 66  | Maeder 2013 reported: "58% of the patients in the NT-proBNP-guided and 50% in the symptom-guided group had at least one SAE (p=0.32). SAE's related to renal failure (14% versus 2%, p=0.01) were more common in the NT-proBNP-guided group, whereas hypotension tended to be less common (0% versus 8%, p=0.06)." No additional information                                                                                      |
| Persson<br>2010   | 126 | 124 | 250 | 8  | 7  | 15 | 42              | 39              | 81  | No additional information provided                                                                                                                                                                                                                                                                                                                                                                                                |
| Pfisterer<br>2009 | 251 | 248 | 499 | 32 | 29 | 61 | 123             | 113             | 236 | P = 0.47<br><br>Renal impairment: intervention group n = 4, control group n = 5 (P = 0.64)<br>Hypotension: intervention group n = 6, control group n = 3 (P = 0.22)<br>No other type of adverse event described.<br><br>Adverse events ≥ 75 years old patients: intervention group 10.5% vs control group 5.5% (P = 0.12)<br>Adverse events in < 75 years old patients: intervention group 3.7% vs. control group 4.9% (P = 0.74) |
| Troughton<br>2000 | 33  | 36  | 69  | 0  | 0  | 0  | 13              | 9               | 22  | P = 0.32<br>No additional information provided                                                                                                                                                                                                                                                                                                                                                                                    |

## Appendix 5: Risk of bias summary for each included study

|                    | Random sequence generation (selection bias) | Allocation concealment (selection bias) | Blinding of participants and personnel (performance bias) | Blinding of outcome assessment (detection bias) | Incomplete outcome data (attrition bias) | Selective reporting (reporting bias) | Other bias |
|--------------------|---------------------------------------------|-----------------------------------------|-----------------------------------------------------------|-------------------------------------------------|------------------------------------------|--------------------------------------|------------|
| Anguita 2010       | ?                                           | ?                                       | ?                                                         | ?                                               | +                                        | +                                    | ?          |
| Beck-da-Silva 2005 | ?                                           | +                                       | -                                                         | ?                                               | ?                                        | +                                    | ?          |
| Berger 2010        | +                                           | +                                       | -                                                         | +                                               | +                                        | -                                    | ?          |
| Eurlings 2010      | ?                                           | +                                       | -                                                         | +                                               | ?                                        | -                                    | ?          |
| Felker 2017        | +                                           | +                                       | -                                                         | +                                               | ?                                        | ?                                    | ?          |
| Januzzi 2011       | +                                           | ?                                       | -                                                         | ?                                               | ?                                        | +                                    | ?          |
| Jourdain 2007      | ?                                           | ?                                       | -                                                         | ?                                               | +                                        | +                                    | ?          |
| Karlstrom 2011     | +                                           | +                                       | -                                                         | +                                               | ?                                        | +                                    | ?          |
| Krupicka 2010      | ?                                           | +                                       | -                                                         | ?                                               | ?                                        | +                                    | ?          |
| Lainchbury 2010    | +                                           | ?                                       | +                                                         | +                                               | ?                                        | -                                    | +          |
| Li 2015            | ?                                           | ?                                       | ?                                                         | ?                                               | +                                        | +                                    | ?          |
| Maeder 2013        | +                                           | +                                       | -                                                         | ?                                               | ?                                        | -                                    | ?          |
| Persson 2010       | ?                                           | ?                                       | ?                                                         | ?                                               | ?                                        | -                                    | ?          |
| Pfisterer 2009     | +                                           | +                                       | -                                                         | ?                                               | ?                                        | +                                    | ?          |
| Schou 2013         | ?                                           | ?                                       | -                                                         | +                                               | +                                        | -                                    | ?          |
| Shah 2011          | +                                           | +                                       | -                                                         | -                                               | +                                        | -                                    | ?          |
| Shochat 2012       | +                                           | ?                                       | ?                                                         | ?                                               | ?                                        | ?                                    | ?          |
| Skvortsov 2015     | +                                           | ?                                       | ?                                                         | -                                               | +                                        | ?                                    | ?          |
| Troughton 2000     | +                                           | ?                                       | -                                                         | ?                                               | +                                        | +                                    | ?          |

## Appendix 6: Risk of bias bar chart for all studies

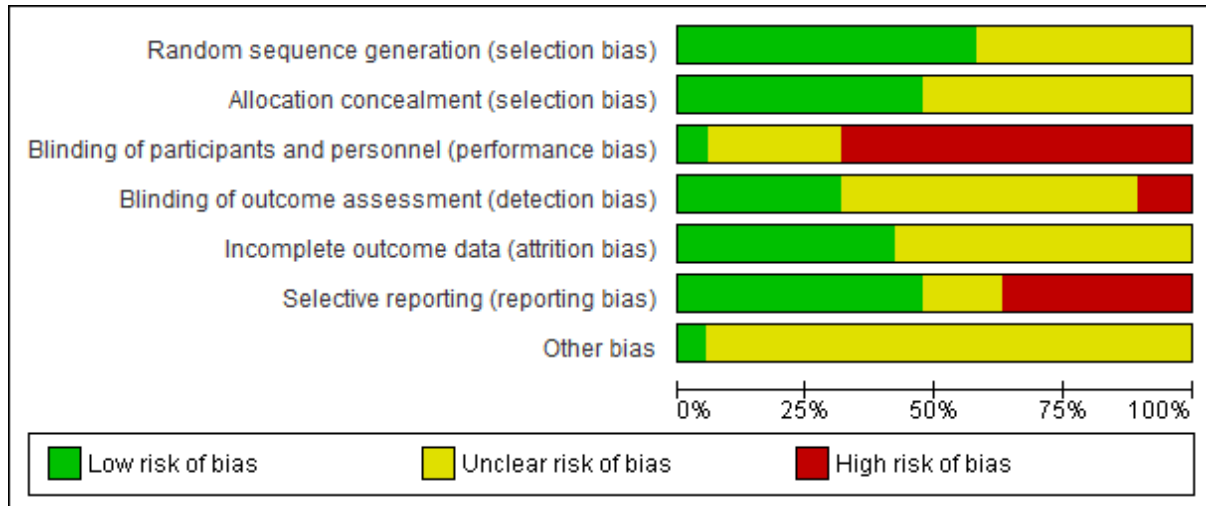



## Appendix 7: Forest plot comparing NP-guided treatment versus control for all-cause mortality sub grouped by duration of intervention

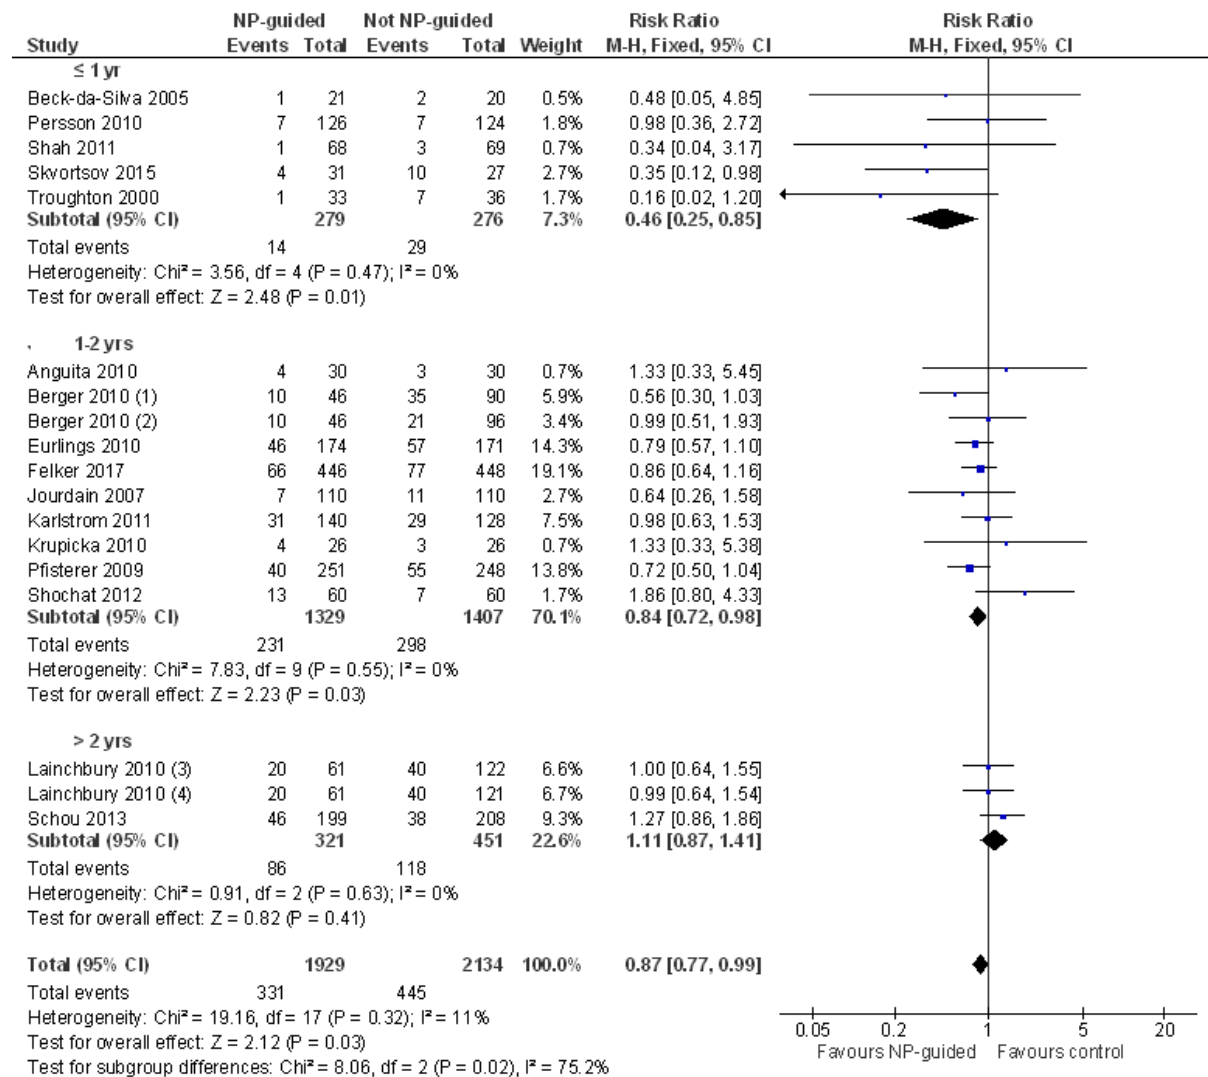

### Footnotes

- (1) Usual care
- (2) Multidisciplinary care
- (3) Usual care
- (4) Clinically guided care

## Appendix 8: Forest plot comparing NP-guided treatment versus control for heart failure admission sub grouped by duration of intervention

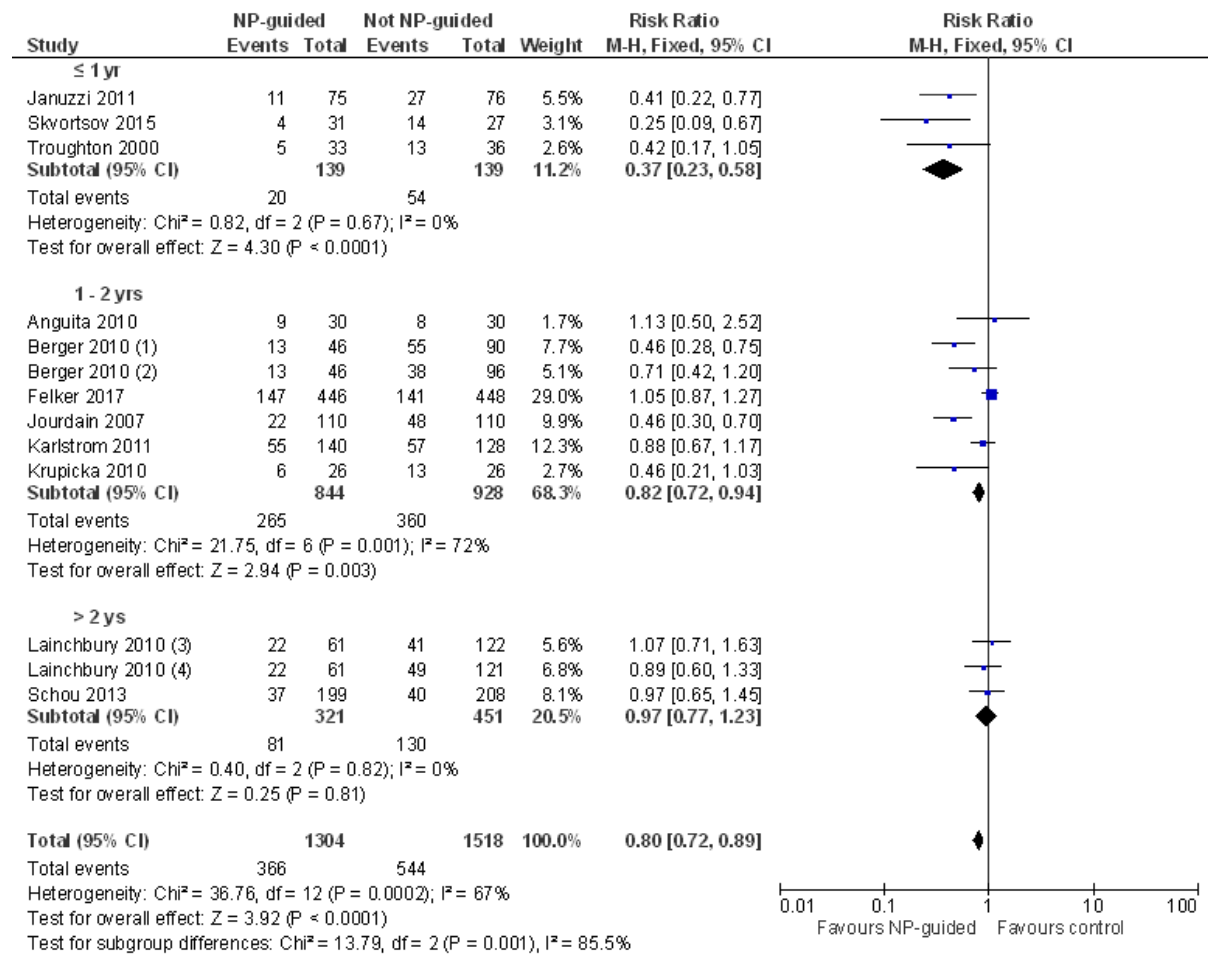

### Footnotes

- (1) Usual care
- (2) Multidisciplinary care
- (3) Usual care
- (4) Clinically guided care

## Appendix 9: Forest plot comparing NP-guided treatment versus control for all-cause mortality sub grouped by NP biomarker used

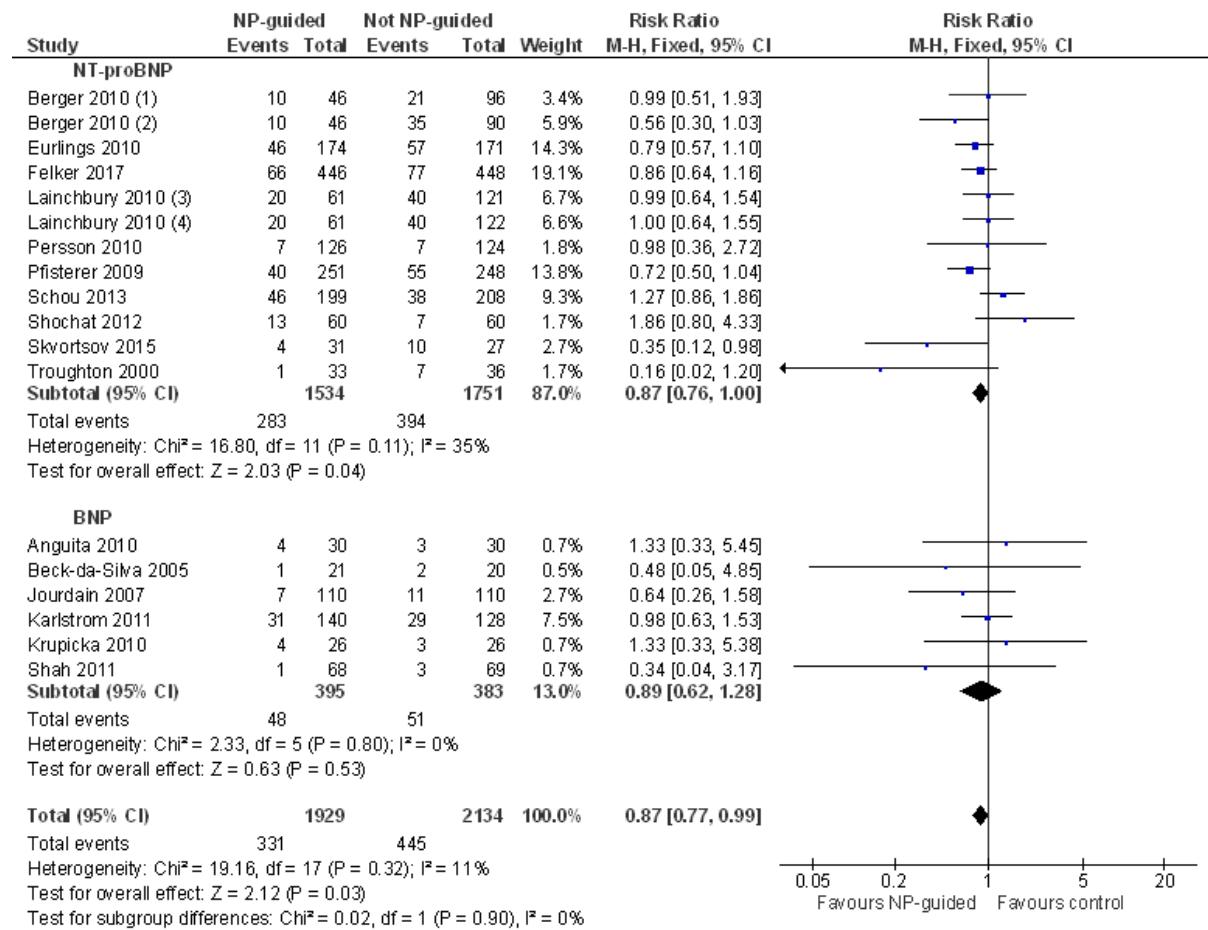

### Footnotes

- (1) Multidisciplinary care
- (2) Usual care
- (3) Clinically guided care
- (4) Usual care

## Appendix 10: Forest plot comparing NP-guided treatment versus control for heart failure admission sub grouped by NP biomarker used

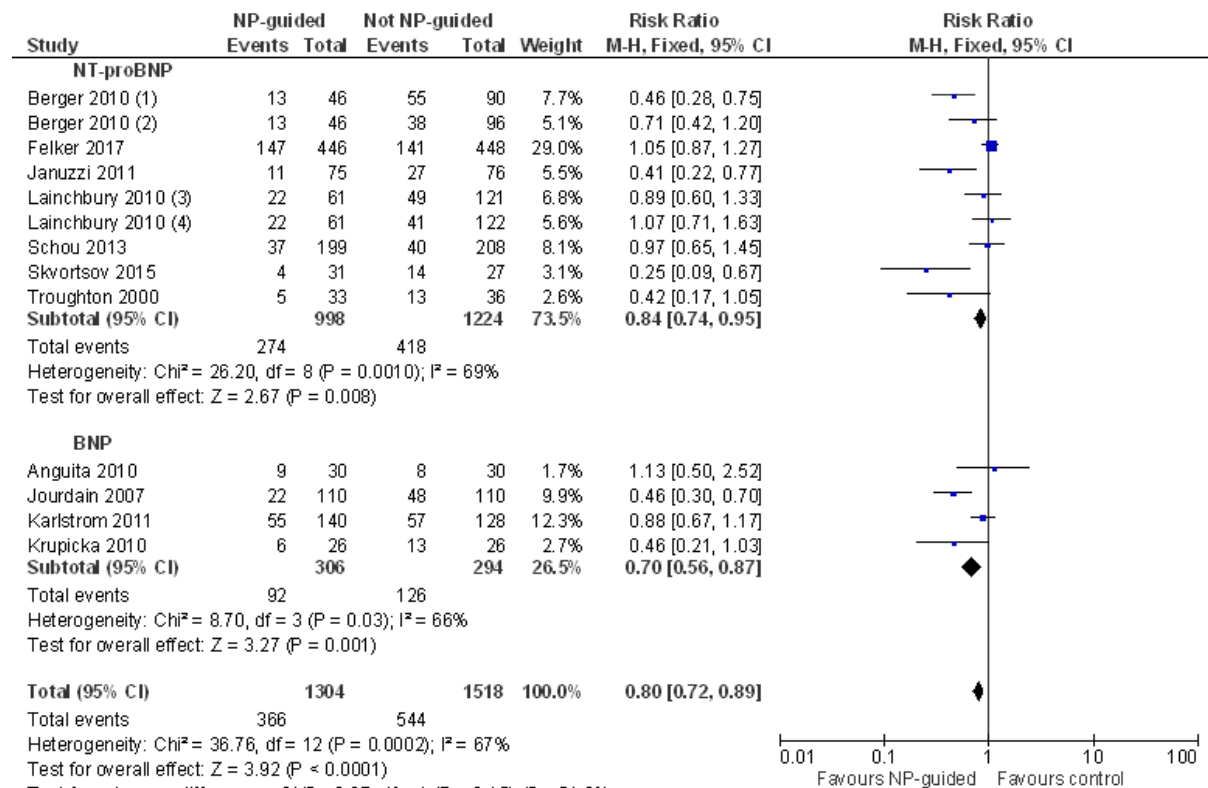

### Footnotes

- (1) Usual care
- (2) Multidisciplinary care
- (3) Clinically guided care
- (4) Usual care

**Appendix 11: Table to show agreements and disagreements with other systematic reviews and meta-analyses**

| Outcome                                         | Review                        | Number of RCTs | N           | Summary measure |             | 95% Confidence intervals | p-value            | Heterogeneity (I <sup>2</sup> ) |
|-------------------------------------------------|-------------------------------|----------------|-------------|-----------------|-------------|--------------------------|--------------------|---------------------------------|
|                                                 |                               |                |             |                 |             |                          |                    |                                 |
| <b>All-cause mortality (all patients)</b>       | Felker 2009 <sup>20</sup>     | 6              | 1627        | HR              | 0.69        | 0.55 to 0.86             | NR                 | NR                              |
|                                                 | Porapakham 2010 <sup>21</sup> | 8              | 1726        | RR              | 0.76        | 0.63 to 0.91             | 0.003*             | NR                              |
|                                                 | Li 2013 <sup>22</sup>         | 11             | 2414        | RR              | 0.83        | 0.69 to 0.99             | 0.035*             | 0%                              |
|                                                 | Savarese 2013 <sup>23</sup>   | 12             | 2686        | OR              | 0.74        | 0.6 to 0.91              | 0.005*             | 0%                              |
|                                                 | Li 2014 <sup>24</sup>         | NR             | NR          | RR              | 0.79        | 0.67 to 0.92             | 0.004*             | NR                              |
|                                                 | Troughton 2014 <sup>25</sup>  | 10             | 2280        | HR              | 0.82        | 0.67 to 1.00             | 0.05               | 0%                              |
|                                                 | Xin 2015 <sup>26</sup>        | 14             | 3004        | RR              | 0.94        | 0.81 to 1.08             | 0.39               | 3%                              |
|                                                 | McLellan 2016 <sup>27</sup>   | 15             | 3169        | RR              | 0.87        | 0.76 to 1.01             | 0.06               | 16%                             |
|                                                 | Purfulete 2017 <sup>28</sup>  | 11             | 2919        | HR              | 0.87        | 0.73 to 1.04             | 0.423              | 2.4%                            |
|                                                 | <b>This review</b>            | <b>16</b>      | <b>4063</b> | <b>RR</b>       | <b>0.87</b> | <b>0.77 to 0.99</b>      | <b>0.03*</b>       | <b>11%</b>                      |
| <b>Heart failure admission</b>                  | Li 2013 <sup>22</sup>         | 7              | 1190        | RR              | 0.65        | 0.5 to 0.84              | 0.001*             | 52.30%                          |
|                                                 | Savarese 2013 <sup>23</sup>   | 8              | 1920        | OR              | 0.55        | 0.4 to 0.77              | <0.0001*           | 58.20%                          |
|                                                 | Li 2014 <sup>24</sup>         | NR             | NR          | RR              | 0.67        | 0.46 to 0.97             | 0.03*              | NR                              |
|                                                 | Troughton 2014 <sup>25</sup>  | 11             | 2431        | HR              | 0.74        | 0.60 to 0.90             | 0.002*             | 24.00%                          |
|                                                 | Xin 2015 <sup>26</sup>        | 11             | 2572        | RR              | 0.79        | 0.63 to 0.98             | 0.03*              | 67.00%                          |
|                                                 | McLellan 2016 <sup>27</sup>   | 10             | 1928        | RR              | 0.70        | 0.61 to 0.80             | <0.0001*           | 60%                             |
|                                                 | Purfulete 2017 <sup>28</sup>  | 12             | 2939        | HR              | 0.78        | 0.65 to 0.95             | 0.064              | 40.4%                           |
|                                                 | <b>This review</b>            | <b>11</b>      | <b>2822</b> | <b>RR</b>       | <b>0.8</b>  | <b>0.72 to 0.89</b>      | <b>&lt;0.0001*</b> | <b>67.00%</b>                   |
| <b>All-cause admission</b>                      | Porapakham 2010 <sup>21</sup> | 3              | 330         | RR              | 0.82        | 0.64 to 1.05             | 0.12               | NR                              |
|                                                 | Savarese 2013 <sup>23</sup>   | 5              | 1108        | OR              | 0.8         | 0.63- 1.02               | 0.077              | 0%                              |
|                                                 | Xin 2015 <sup>26</sup>        | 7              | 1627        | RR              | 0.97        | 0.89 to 1.07             | 0.56               | 8%                              |
|                                                 | Purfulete 2017 <sup>28</sup>  | 6              | 1606        | HR              | 0.97        | 0.85 to 1.10             | 0.651              | 0%                              |
|                                                 | McLellan 2016 <sup>27</sup>   | 6              | 1142        | RR              | 0.93        | 0.84 to 1.03             | 0.15               | 0%                              |
| <b>Adverse events</b>                           | Li 2014 <sup>24</sup>         | NR             | NR          | RR              | 1.15        | 0.99 to 1.34             | 0.69               | NR                              |
| <b>Adverse events (symptomatic hypotension)</b> | Xin 2015 <sup>26</sup>        | 4              | 838         | RR              | 1.72        | 0.59 to 5.05             | 0.32               | 43%                             |

|                                           |                             |   |      |     |       |               |      |     |
|-------------------------------------------|-----------------------------|---|------|-----|-------|---------------|------|-----|
| <b>Adverse events (hyper/hypokalemia)</b> | Xin 2015 <sup>26</sup>      | 2 | 354  | RR  | 1.34  | 0.42 to 4.34  | 0.62 | 0%  |
| <b>Adverse events (renal dysfunction)</b> | Xin 2015 <sup>26</sup>      | 3 | 769  | RR  | 1.46  | 0.34 to 6.24  | 0.21 | 0%  |
| <b>Adverse events (severe cough)</b>      | Xin 2015 <sup>26</sup>      | 2 | 220  | RR  | 1.93  | 0.69 to 5.37  | 0.21 | 0%  |
| <b>Quality of life</b>                    | Xin 2015 <sup>26</sup>      | 5 | 1172 | WMD | -1.29 | -3.81 to 1.22 | 0.31 | 49% |
|                                           | McLellan 2016 <sup>27</sup> | 8 | 1812 | WMD | -0.03 | -1.18 to 1.13 | 0.97 | 75% |

Where RCT – randomised control trial, HR - hazard ratio, RR - risk ratio, OR - odds ratio, WMD - weighted mean difference, NR - not reported, \* - statistically significant result

**Appendix 12: Funnel plot comparing NP-guided versus control for all-cause mortality**

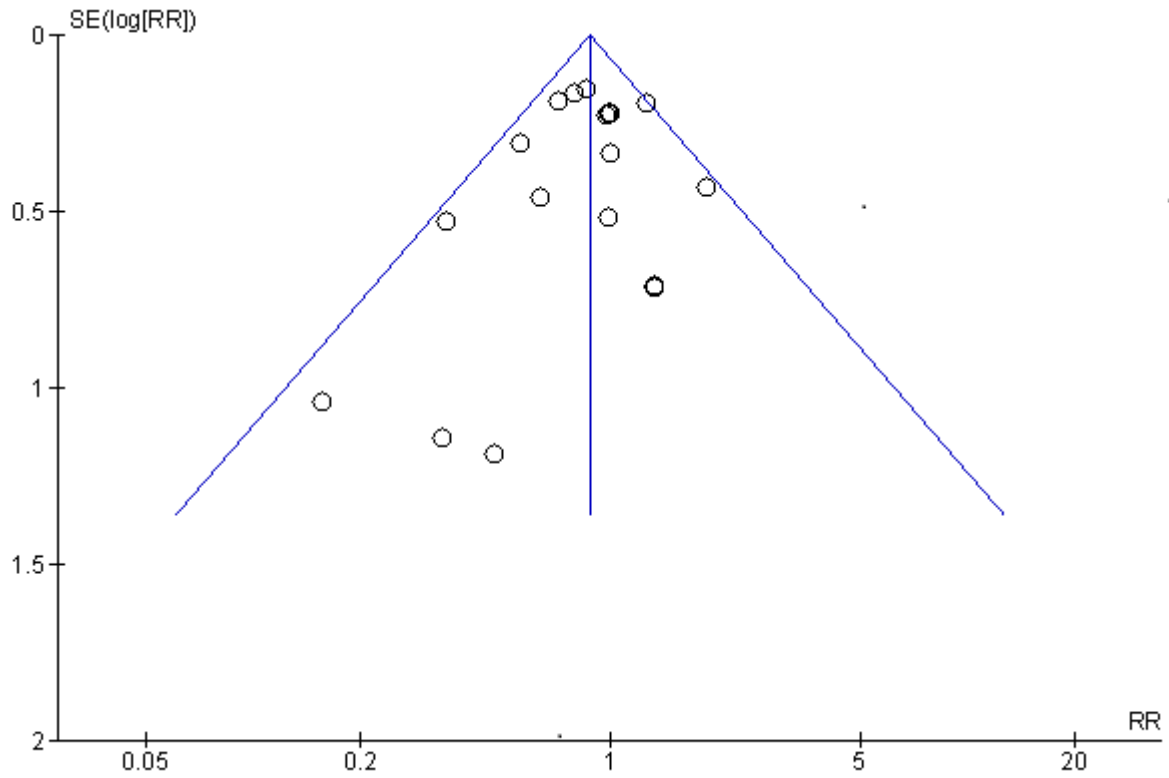

## REFERENCES

1. Anguita M, Esteban F, Castillo JC, et al. [Usefulness of brain natriuretic peptide levels, as compared with usual clinical control, for the treatment monitoring of patients with heart failure]. *Medicina clinica* 2010;135(10):435-40. doi: 10.1016/j.medcli.2009.11.048 [published Online First: 2010/08/03]
2. Beck-da-Silva L, de Bold A, Fraser M, et al. BNP-guided therapy not better than expert's clinical assessment for beta-blocker titration in patients with heart failure. *Congestive heart failure (Greenwich, Conn)* 2005;11(5):248-53; quiz 54-5. [published Online First: 2005/10/19]
3. Berger R, Moertl D, Peter S, et al. N-terminal pro-B-type natriuretic peptide-guided, intensive patient management in addition to multidisciplinary care in chronic heart failure a 3-arm, prospective, randomized pilot study. *Journal of the American College of Cardiology* 2010;55(7):645-53. doi: 10.1016/j.jacc.2009.08.078 [published Online First: 2010/02/23]
4. Eurlings LW, van Pol PE, Kok WE, et al. Management of chronic heart failure guided by individual N-terminal pro-B-type natriuretic peptide targets: results of the PRIMA (Can PRo-brain-natriuretic peptide guided therapy of chronic heart failure IMprove heart fAilure morbidity and mortality?) study. *Journal of the American College of Cardiology* 2010;56(25):2090-100. doi: 10.1016/j.jacc.2010.07.030 [published Online First: 2010/12/15]
5. Felker GM, Anstrom KJ, Adams KF, et al. Effect of Natriuretic Peptide-Guided Therapy on Hospitalization or Cardiovascular Mortality in High-Risk Patients With Heart Failure and Reduced Ejection Fraction: A Randomized Clinical Trial. *JAMA* 2017;318(8):713-20. doi: 10.1001/jama.2017.10565
6. Januzzi JL, Jr., Rehman SU, Mohammed AA, et al. Use of amino-terminal pro-B-type natriuretic peptide to guide outpatient therapy of patients with chronic left ventricular systolic dysfunction. *Journal of the American College of Cardiology* 2011;58(18):1881-9. doi: 10.1016/j.jacc.2011.03.072 [published Online First: 2011/10/25]
7. Jourdain P, Jondeau G, Funck F, et al. Plasma brain natriuretic peptide-guided therapy to improve outcome in heart failure: the STARS-BNP Multicenter Study. *Journal of the American College of Cardiology* 2007;49(16):1733-9. doi: 10.1016/j.jacc.2006.10.081 [published Online First: 2007/04/24]
8. Karlstrom P, Alehagen U, Boman K, et al. Brain natriuretic peptide-guided treatment does not improve morbidity and mortality in extensively treated patients with chronic heart failure: responders to treatment have a significantly better outcome. *European journal of heart failure* 2011;13(10):1096-103. doi: 10.1093/eurjhf/hfr078 [published Online First: 2011/07/01]
9. Optimization of heart failure therapy guided by plasma BNP concentrations. European Society of Cardiology, ESC Congress 2010; Stockholm Sweden.
10. Lainchbury JG, Troughton RW, Strangman KM, et al. N-terminal pro-B-type natriuretic peptide-guided treatment for chronic heart failure: results from the BATTLESCARRED (NT-proBNP-Assisted Treatment To Lessen Serial Cardiac Readmissions and Death) trial. *Journal of the American College of Cardiology* 2009;55(1):53-60. doi: 10.1016/j.jacc.2009.02.095 [published Online First: 2010/02/02]
11. Li JJ, Xiang XL, Tian XY, et al. Clinical Research on Brain Natriuretic Peptide Guiding the Application of beta1 Receptor Blocker in Patients with Moderate to Severe Heart Failure. *Acta Cardiologica Sinica* 2015;31(1):52-8. [published Online First: 2015/01/01]
12. Maeder MT, Rickenbacher P, Rickli H, et al. N-terminal pro brain natriuretic peptide-guided management in patients with heart failure and preserved ejection fraction: findings from the Trial of Intensified versus standard medical therapy in elderly patients with congestive heart failure (TIME-CHF). *European journal of heart failure* 2013;15(10):1148-56. doi: 10.1093/eurjhf/hft076 [published Online First: 2013/05/10]
13. Persson H, Erntell H, Eriksson B, et al. Improved pharmacological therapy of chronic heart failure in primary care: a randomized Study of NT-proBNP Guided Management of Heart Failure--



- SIGNAL-HF (Swedish Intervention study--Guidelines and NT-proBNP AnaLysis in Heart Failure). *European journal of heart failure* 2010;12(12):1300-8. doi: 10.1093/eurjhf/hfq169 [published Online First: 2010/09/30]
14. Pfisterer M, Buser P, Rickli H, et al. BNP-guided vs symptom-guided heart failure therapy: the Trial of Intensified vs Standard Medical Therapy in Elderly Patients With Congestive Heart Failure (TIME-CHF) randomized trial. *Jama* 2009;301(4):383-92. doi: 10.1001/jama.2009.2 [published Online First: 2009/01/30]
  15. Schou M, Gustafsson F, Videbaek L, et al. Adding serial N-terminal pro brain natriuretic peptide measurements to optimal clinical management in outpatients with systolic heart failure: a multicentre randomized clinical trial (NorthStar monitoring study). *European journal of heart failure* 2013;15(7):818-27. doi: 10.1093/eurjhf/hft037 [published Online First: 2013/03/20]
  16. Shah MR, Califf RM, Nohria A, et al. The STARBRITE trial: a randomized, pilot study of B-type natriuretic peptide-guided therapy in patients with advanced heart failure. *Journal of cardiac failure* 2011;17(8):613-21. doi: 10.1016/j.cardfail.2011.04.012 [published Online First: 2011/08/03]
  17. NT-proBNP-guided preemptive treatment of outpatients with chronic heart failure followed in a out hospital clinic. *Journal of Cardiac Failure* 2012;Conference: 16th Annual Scientific Meeting of the Heart Failure Society of America, HFSA; 2012; Seattle, WA United States.
  18. Skvortsov AA, Koshkina DE, Protasov VN, et al. NT-proBNP-guided therapy reduces risk of death and hospitalisation in patients after decompensation of heart failure [Терапия под контролем NT-проBNP снижает риск смерти и частоту госпитализаций у больных последекомпенсации сердечной недостаточности]. *Russian Heart Failure Journal* 2015;16(4):204-17.
  19. Troughton RW, Frampton CM, Yandle TG, et al. Treatment of heart failure guided by plasma aminoterminal brain natriuretic peptide (N-BNP) concentrations. *Lancet (London, England)* 2000;355(9210):1126-30. [published Online First: 2000/05/03]
  20. Felker GM, Hasselblad V, Hernandez AF, et al. Biomarker-guided therapy in chronic heart failure: a meta-analysis of randomized controlled trials. *American heart journal* 2009;158(3):422-30. doi: 10.1016/j.ahj.2009.06.018 [published Online First: 2009/08/25]
  21. Porapakham P, Porapakham P, Zimmet H, et al. B-type natriuretic peptide-guided heart failure therapy: A meta-analysis. *Archives of internal medicine* 2010;170(6):507-14. doi: 10.1001/archinternmed.2010.35 [published Online First: 2010/03/24]
  22. Li P, Luo Y, Chen YM. B-type natriuretic peptide-guided chronic heart failure therapy: a meta-analysis of 11 randomised controlled trials. *Heart, lung & circulation* 2013;22(10):852-60. doi: 10.1016/j.hlc.2013.03.077 [published Online First: 2013/04/23]
  23. Savarese G, Trimarco B, Dellegrottaglie S, et al. Natriuretic peptide-guided therapy in chronic heart failure: a meta-analysis of 2,686 patients in 12 randomized trials. *PLoS one* 2013;8(3):e58287. doi: 10.1371/journal.pone.0058287 [published Online First: 2013/03/09]
  24. Li Y, Pei H, Zhou X, et al. Efficacy, modifiable factors to efficacy, safety of B-type natriuretic peptide-guided heart failure therapy: A meta-analysis. *Cardiology (Switzerland)* 2014;66.
  25. Troughton RW, Frampton CM, Brunner-La Rocca HP, et al. Effect of B-type natriuretic peptide-guided treatment of chronic heart failure on total mortality and hospitalization: an individual patient meta-analysis. *European heart journal* 2014;35(23):1559-67. doi: 10.1093/eurheartj/ehu090 [published Online First: 2014/03/08]
  26. Xin W, Lin Z, Mi S. Does B-type natriuretic peptide-guided therapy improve outcomes in patients with chronic heart failure? A systematic review and meta-analysis of randomized controlled trials. *Heart failure reviews* 2015;20(1):69-80. doi: 10.1007/s10741-014-9437-8 [published Online First: 2014/06/04]
  27. McLellan J, Heneghan CJ, Perera R, et al. B-type natriuretic peptide-guided treatment for heart failure. *The Cochrane database of systematic reviews* 2016;12:Cd008966. doi: 10.1002/14651858.CD008966.pub2 [published Online First: 2017/01/20]

28. Pufulete M, Maishman R, Dabner L, et al. Effectiveness and cost-effectiveness of serum B-type natriuretic peptide testing and monitoring in patients with heart failure in primary and secondary care: an evidence synthesis, cohort study and cost-effectiveness model. *Health technology assessment (Winchester, England)* 2017;21(40):1-150. doi: 10.3310/hta21400 [published Online First: 2017/08/05]
